# Supplementary material for: Single copy/knock-in models of ALS SOD1 in C. elegans suggest loss and gain of function have different contributions to cholinergic and glutamatergic neurodegeneration
Source: PubMed Central journal article supplement (PMC6200258; doi:10.1371/journal.pgen.1007682), 2018-10-08
Supplement: pgen.1007682.s005.pdf [file pgen.1007682.s005.pdf]

| <b>Primer Name</b>     | <b>Sequence</b>                                                                                                                                                                                             |
|------------------------|-------------------------------------------------------------------------------------------------------------------------------------------------------------------------------------------------------------|
| <i>sodF</i>            | tgatgctagcgggaaggaacagacgttttgc                                                                                                                                                                             |
| <i>sod-1RC</i>         | tgatcccgggtggctctattcagaaagaacg                                                                                                                                                                             |
| <i>sod1A4V-F</i>       | ctcaaaaaatgtcgaaccgtgtgtcgctgttctctgtgg                                                                                                                                                                     |
| <i>sod1A4V-RC</i>      | ccacgaagaacagcgacaacacgggtcgacatttttgag                                                                                                                                                                     |
| <i>sod1H71Y-F</i>      | caatccatttgaaagacttatggtggaccaaagatgg                                                                                                                                                                       |
| <i>sod1H71Y-RC</i>     | ccatacttttggtccaccataagtctttccaaatggattg                                                                                                                                                                    |
| <i>sod1G85R-F</i>      | tcacgtaggcgtactacgaaatgtggaagctggagc                                                                                                                                                                        |
| <i>sod1G85R-RC</i>     | gctccagctccacatttcgtagatcgctactcgtga                                                                                                                                                                        |
| <i>sod-1_guide2_f</i>  | acgagcgtgtgttttagagctagaaatagc                                                                                                                                                                              |
| <i>sod-1_guide2_r</i>  | cacgctttacaacatttagattgcaattc                                                                                                                                                                               |
| <i>sod-1WT_ssODN</i>   | cggccaacgacagtgttggaccgtaaagcgtgacgagcgtgtccgtgagcttgattttggccactccatcggctccagc<br>ttccacatttctagatcgctactcgtg                                                                                              |
| <i>sod-1L84V_ssODN</i> | cggccaacgacagtgttggaccgtaaagcgtgacgagcgtgtccgtgagcttgattttggccactccatcggctccagc<br>ttccacatttctacatcgctactcgtgacggatctcggactgaaaaaatattataattc                                                              |
| <i>sod-1G85R_ssODN</i> | cggccaacgacagtgttggaccgtaaagcgtgacgagcgtgtccgtgagcttgattttggccactccatcggctccagc<br>ttccacatttctagatcgctactcgtgacggatctcggactgaaaaaatattataattc                                                              |
| <i>sod-1G93A_ssODN</i> | cggccaacgacagtgttggaccgtaaagcgtgacgagcgtgtccgtgagcttgattttggccacagcatcggctccag<br>cttccacatttctagatcgctactcgtg                                                                                              |
| <i>sod-1cIIgenoF</i>   | aaacttttctgggcaattcg                                                                                                                                                                                        |
| <i>sod-1cIIgenoRC1</i> | gcatctatcgactgtgatctgc                                                                                                                                                                                      |
| <i>pha-1_200_ssODN</i> | ggagttttgtgtacattacatttcagggtcttaaaacaacatgaagattatggtaatcaaaatacgaatcgaagactca<br>aaaagagtatgctgatgattacagatgttcatcaagttattcataaatcattgatagggtcagattgtaagtcttgattatctat<br>cgttttgtaaagtactaaacttaatacatta |
| <i>pha-1_geno_f</i>    | caatttggcagccattcatgtg                                                                                                                                                                                      |
| <i>pha-1_geno_r</i>    | tcgcgactactgaatcagagtc                                                                                                                                                                                      |
