# Supplementary material for: Single copy/knock-in models of ALS SOD1 in C. elegans suggest loss and gain of function have different contributions to cholinergic and glutamatergic neurodegeneration
Source: PubMed Central journal article supplement (PMC6200258; doi:10.1371/journal.pgen.1007682), 2018-10-08
Supplement: pgen.1007682.s006.pdf [file pgen.1007682.s006.pdf]

| Strain name | Genotype                                                                                                                                                      |
|-------------|---------------------------------------------------------------------------------------------------------------------------------------------------------------|
| N2          | sod-1(+)                                                                                                                                                      |
| HA2281      | sod-1(tm776)                                                                                                                                                  |
| EG6700      | unc-119(ed3) III; cxT110882 IV; oxEx1579                                                                                                                      |
| VS21        | hJSi20 [myo-2p::mCherry::unc-54 3'UTR] IV                                                                                                                     |
| HA2395      | sod-1(tm776) II; unc-119(+)                                                                                                                                   |
| HA2297      | sod-1(+); II; unc-119(+); III; rSi001 [sod-1p::sod-1WT <sup>M</sup> ::sod-1 3'UTR + Cbr-unc-119(+)] IV                                                        |
| HA2408      | sod-1(+); II; unc-119(+); III; rSi008 [sod-1p::sod-1A4V <sup>M</sup> ::sod-1 3'UTR + Cbr-unc-119(+)] IV                                                       |
| HA2309      | sod-1(+); II; unc-119(+); III; rSi007 [sod-1p::sod-1H71Y <sup>M</sup> ::sod-1 3'UTR + Cbr-unc-119(+)] IV                                                      |
| HA2308      | sod-1(+); II; unc-119(+); III; rSi006 [sod-1p::sod-1G85R <sup>M</sup> ::sod-1 3'UTR + Cbr-unc-119(+)] IV                                                      |
| HA2621      | sod-1(+); II; unc-119(+); III; rSi026 [Cbr-unc-119(+)] IV                                                                                                     |
| HA2619      | sod-1(tm776) II; unc-119(+); III; rSi001 [sod-1p::sod-1WT <sup>M</sup> ::sod-1 3'UTR + Cbr-unc-119(+)] IV                                                     |
| HA2464      | sod-1(tm776) II; unc-119(+); III; rSi008 [sod-1p::sod-1A4V <sup>M</sup> ::sod-1 3'UTR + Cbr-unc-119(+)] IV                                                    |
| HA2425      | sod-1(tm776) II; unc-119(+); III; rSi007 [sod-1p::sod-1H71Y <sup>M</sup> ::sod-1 3'UTR + Cbr-unc-119(+)] IV                                                   |
| HA2426      | sod-1(tm776) II; unc-119(+); III; rSi006 [sod-1p::sod-1G85R <sup>M</sup> ::sod-1 3'UTR + Cbr-unc-119(+)] IV                                                   |
| HA2622      | sod-1(tm776) II; unc-119(+); III; rSi026 [Cbr-unc-119(+)] IV                                                                                                  |
| HA2532      | sod-1(tm776) II; unc-119(+); III; rSi001 [sod-1p::sod-1WT <sup>M</sup> ::sod-1 3'UTR + Cbr-unc-119(+)] IV; oxIs12 [unc-47p::GFP] X                            |
| HA2533      | sod-1(tm776) II; unc-119(+); III; rSi008 [sod-1p::sod-1A4V <sup>M</sup> ::sod-1 3'UTR + Cbr-unc-119(+)] IV; oxIs12 [unc-47p::GFP] X                           |
| HA2534      | sod-1(tm776) II; unc-119(+); III; rSi007 [sod-1p::sod-1H71Y <sup>M</sup> ::sod-1 3'UTR + Cbr-unc-119(+)] IV; oxIs12 [unc-47p::GFP] X                          |
| HA2535      | sod-1(tm776) II; unc-119(+); III; rSi006 [sod-1p::sod-1G85R <sup>M</sup> ::sod-1 3'UTR + Cbr-unc-119(+)] IV; oxIs12 [unc-47p::GFP] X                          |
| HA2679      | sod-1(tm776) II; unc-119(+); III; rSi026 [Cbr-unc-119(+)] IV; oxIs12 [unc-47p::GFP] X                                                                         |
| HA2615      | sod-1(tm776) II; unc-119(+); III; rSi001 [sod-1p::sod-1WT <sup>M</sup> ::sod-1 3'UTR + Cbr-unc-119(+)] IV; [snb-1p::hSOD1WT::YFP]                             |
| HA2620      | sod-1(tm776) II; unc-119(+); III; rSi008 [sod-1p::sod-1A4V <sup>M</sup> ::sod-1 3'UTR + Cbr-unc-119(+)] IV; [snb-1p::hSOD1WT::YFP]                            |
| HA2617      | sod-1(tm776) II; unc-119(+); III; rSi007 [sod-1p::sod-1H71Y <sup>M</sup> ::sod-1 3'UTR + Cbr-unc-119(+)] IV; [snb-1p::hSOD1WT::YFP]                           |
| HA2616      | sod-1(tm776) II; unc-119(+); III; rSi006 [sod-1p::sod-1G85R <sup>M</sup> ::sod-1 3'UTR + Cbr-unc-119(+)] IV; [snb-1p::hSOD1WT::YFP]                           |
| HA2703      | sod-1(tm776) II; unc-119(+); III; rSi026 [Cbr-unc-119(+)] IV; [snb-1p::hSOD1WT::YFP]                                                                          |
| LX929       | sod-1(+); II; vsIs48 [unc-17p::GFP]                                                                                                                           |
| HA3525      | sod-1(tm776) II; vsIs48 [unc-17p::GFP]                                                                                                                        |
| HA2630      | sod-1(tm776) II; unc-119(+); III; rSi001 [sod-1p::sod-1WT <sup>M</sup> ::sod-1 3'UTR + Cbr-unc-119(+)] IV; vsIs48 [unc-17p::GFP]                              |
| HA2631      | sod-1(tm776) II; unc-119(+); III; rSi008 [sod-1p::sod-1A4V <sup>M</sup> ::sod-1 3'UTR + Cbr-unc-119(+)] IV; vsIs48 [unc-17p::GFP]                             |
| HA2632      | sod-1(tm776) II; unc-119(+); III; rSi007 [sod-1p::sod-1H71Y <sup>M</sup> ::sod-1 3'UTR + Cbr-unc-119(+)] IV; vsIs48 [unc-17p::GFP]                            |
| HA2633      | sod-1(tm776) II; unc-119(+); III; rSi006 [sod-1p::sod-1G85R <sup>M</sup> ::sod-1 3'UTR + Cbr-unc-119(+)] IV; vsIs48 [unc-17p::GFP]                            |
| HA2680      | sod-1(tm776) II; unc-119(+); III; rSi026 [Cbr-unc-119(+)] IV; vsIs48 [unc-17p::GFP]                                                                           |
| HA2696      | sod-1(+); II; unc-119(+); III; rSi001 [sod-1p::sod-1WT <sup>M</sup> ::sod-1 3'UTR + Cbr-unc-119(+)] IV; vsIs48 [unc-17p::GFP]                                 |
| HA2695      | sod-1(+); II; unc-119(+); III; rSi008 [sod-1p::sod-1A4V <sup>M</sup> ::sod-1 3'UTR + Cbr-unc-119(+)] IV; vsIs48 [unc-17p::GFP]                                |
| HA2701      | sod-1(+); II; unc-119(+); III; rSi007 [sod-1p::sod-1H71Y <sup>M</sup> ::sod-1 3'UTR + Cbr-unc-119(+)] IV; vsIs48 [unc-17p::GFP]                               |
| HA2702      | sod-1(+); II; unc-119(+); III; rSi006 [sod-1p::sod-1G85R <sup>M</sup> ::sod-1 3'UTR + Cbr-unc-119(+)] IV; vsIs48 [unc-17p::GFP]                               |
| HA2697      | sod-1(+); II; unc-119(+); III; rSi026 [Cbr-unc-119(+)] IV; vsIs48 [unc-17p::GFP]                                                                              |
| HA3526      | sod-1(tm776) II; [snb-1p::hSOD1WT-YFP]                                                                                                                        |
| HA3527      | sod-1(tm776) II; [snb-1p::hSOD1G85R-YFP]                                                                                                                      |
| HA3378      | sod-1(+); II; [snb-1p::hSOD1WT-YFP]; otlS544 [cho-1(fosmid)::SL2::mCherry::H2B + pha-1(+)]                                                                    |
| HA3380      | sod-1(tm776) II; [snb-1p::hSOD1WT-YFP]; otlS544 [cho-1(fosmid)::SL2::mCherry::H2B + pha-1(+)]                                                                 |
| HA3379      | sod-1(+); II; [snb-1p::hSOD1G85R-YFP]; otlS544 [cho-1(fosmid)::SL2::mCherry::H2B + pha-1(+)]                                                                  |
| HA3381      | sod-1(tm776) II; [snb-1p::hSOD1G85R-YFP]; otlS544 [cho-1(fosmid)::SL2::mCherry::H2B + pha-1(+)]                                                               |
| HA3528      | sod-1(tm776) II; unc-119(+); III; rSi001 [sod-1p::sod-1WT <sup>M</sup> ::sod-1 3'UTR + Cbr-unc-119(+)] IV; nuls175 [myo-2p::RFP, unc-129p::RFP::snb-1] X      |
| HA3529      | sod-1(tm776) II; unc-119(+); III; rSi007 [sod-1p::sod-1H71Y <sup>M</sup> ::sod-1 3'UTR + Cbr-unc-119(+)] IV; nuls175 [myo-2p::RFP, unc-129p::RFP::snb-1] X    |
| HA3530      | sod-1(tm776) II; unc-119(+); III; rSi006 [sod-1p::sod-1G85R <sup>M</sup> ::sod-1 3'UTR + Cbr-unc-119(+)] IV; nuls175 [myo-2p::RFP, unc-129p::RFP::snb-1] X    |
| HA3531      | sod-1(tm776) II; unc-119(+); III; rSi026 [Cbr-unc-119(+)] IV; nuls175 [myo-2p::RFP, unc-129p::RFP::snb-1] X                                                   |
| HA3532      | sod-1(tm776) II; unc-119(+); III; rSi001 [sod-1p::sod-1WT <sup>M</sup> ::sod-1 3'UTR + Cbr-unc-119(+)] IV; nuls214 [myo-2p::GFP, unc-129p::itsn-1::GFP] III   |
| HA3533      | sod-1(tm776) II; unc-119(+); III; rSi007 [sod-1p::sod-1H71Y <sup>M</sup> ::sod-1 3'UTR + Cbr-unc-119(+)] IV; nuls214 [myo-2p::GFP, unc-129p::itsn-1::GFP] III |
| HA3534      | sod-1(tm776) II; unc-119(+); III; rSi006 [sod-1p::sod-1G85R <sup>M</sup> ::sod-1 3'UTR + Cbr-unc-119(+)] IV; nuls214 [myo-2p::GFP, unc-129p::itsn-1::GFP] III |
| HA3535      | sod-1(tm776) II; unc-119(+); III; rSi026 [Cbr-unc-119(+)] IV; nuls214 [myo-2p::GFP, unc-129p::itsn-1::GFP] III                                                |
| GE24        | pha-1(e2123) III                                                                                                                                              |
| HA2986      | sod-1(r448[sod-1WT <sup>C</sup> ]) II; pha-1(+)                                                                                                               |
| HA2988      | sod-1(r450[sod-1L84V <sup>C</sup> ]) II; pha-1(+)                                                                                                             |
| HA3299      | sod-1(r451[sod-1G85R <sup>C</sup> ]) II; pha-1(+)                                                                                                             |
| HA2987      | sod-1(r449[sod-1G93A <sup>C</sup> ]) II; pha-1(+)                                                                                                             |
| HA3536      | sod-1(+); II; [snb-1p::hSOD1WT::YFP]                                                                                                                          |
| HA3537      | sod-1(tm776) II; [snb-1p::hSOD1WT::YFP]                                                                                                                       |
| HA3538      | sod-1(r448[sod-1WT <sup>C</sup> ]) II; pha-1(+); III; [snb-1p::hSOD1WT::YFP]                                                                                  |
| HA3539      | sod-1(r450[sod-1L84V <sup>C</sup> ]) II; pha-1(+); III; [snb-1p::hSOD1WT::YFP]                                                                                |
| HA3540      | sod-1(r451[sod-1G85R <sup>C</sup> ]) II; pha-1(+); III; [snb-1p::hSOD1WT::YFP]                                                                                |
| HA3541      | sod-1(r449[sod-1G93A <sup>C</sup> ]) II; pha-1(+); III; [snb-1p::hSOD1WT::YFP]                                                                                |
| HA3542      | sod-1(r448[sod-1WT <sup>C</sup> ]) II; pha-1(+); III; vsIs48 [unc-17p::GFP]                                                                                   |
| HA3543      | sod-1(r450[sod-1L84V <sup>C</sup> ]) II; pha-1(+); III; vsIs48 [unc-17p::GFP]                                                                                 |
| HA3544      | sod-1(r451[sod-1G85R <sup>C</sup> ]) II; pha-1(+); III; vsIs48 [unc-17p::GFP]                                                                                 |
| HA3545      | sod-1(r449[sod-1G93A <sup>C</sup> ]) II; pha-1(+); III; vsIs48 [unc-17p::GFP]                                                                                 |
| HA3         | sod-1(+); II; nuls11 [osm-10p::GFP + lin-15(+)]                                                                                                               |
| HA3546      | sod-1(tm776) II; nuls11 [osm-10p::GFP + lin-15(+)]                                                                                                            |
| HA3547      | sod-1(r448[sod-1WT <sup>C</sup> ]) II; pha-1(+); III; nuls11 [osm-10p::GFP + lin-15(+)]                                                                       |
| HA3548      | sod-1(r451[sod-1G85R <sup>C</sup> ]) II; pha-1(+); III; nuls11 [osm-10p::GFP + lin-15(+)]                                                                     |
| OH7235      | sod-1(+); II; zdIs13 [tph-1p::GFP] IV                                                                                                                         |
| HA3549      | sod-1(tm776) II; zdIs13 [tph-1p::GFP] IV                                                                                                                      |
| HA3550      | sod-1(r448[sod-1WT <sup>C</sup> ]) II; pha-1(+); III; zdIs13 [tph-1p::GFP] IV                                                                                 |
| HA3551      | sod-1(r451[sod-1G85R <sup>C</sup> ]) II; pha-1(+); III; zdIs13 [tph-1p::GFP] IV                                                                               |
| TG2435      | sod-1(+); II; vtIs1 [dat-1p::GFP + rol-6(su1006)] V                                                                                                           |
| HA3552      | sod-1(tm776) II; vtIs1 [dat-1p::GFP + rol-6(su1006)] V                                                                                                        |
| HA3553      | sod-1(r448[sod-1WT <sup>C</sup> ]) II; pha-1(+); III; vtIs1 [dat-1p::GFP + rol-6(su1006)] V                                                                   |
| HA3554      | sod-1(r451[sod-1G85R <sup>C</sup> ]) II; pha-1(+); III; vtIs1 [dat-1p::GFP + rol-6(su1006)] V                                                                 |
