# Supplementary material for: Single copy/knock-in models of ALS SOD1 in C. elegans suggest loss and gain of function have different contributions to cholinergic and glutamatergic neurodegeneration
Source: PubMed Central journal article supplement (PMC6200258; doi:10.1371/journal.pgen.1007682), 2018-10-08
Supplement: pgen.1007682.s007.pdf [file pgen.1007682.s007.pdf]

|             | <b><i>H.s. SOD1 amino acid location</i></b> | <b><i>C.e. SOD-1 amino acid location</i></b> |
|-------------|---------------------------------------------|----------------------------------------------|
| <i>A4V</i>  | 5                                           | 5                                            |
| <i>H71Y</i> | 72                                          | 71                                           |
| <i>L84V</i> | 85                                          | 84                                           |
| <i>G85R</i> | 86                                          | 85                                           |
| <i>G93A</i> | 94                                          | 93                                           |
