# Supplementary material for: Single copy/knock-in models of ALS SOD1 in C. elegans suggest loss and gain of function have different contributions to cholinergic and glutamatergic neurodegeneration
Source: PubMed Central journal article supplement (PMC6200258; doi:10.1371/journal.pgen.1007682), 2018-10-08
Supplement: pgen.1007682.s008.pdf [file pgen.1007682.s008.pdf]

| Panel   | 2.5 mM Paraquat | Genotype                                    | R1          | R2          | R3          | R1, R2, R3 |      | Pooled     | P-value     |                         |                         |                |                          |             |        |
|---------|-----------------|---------------------------------------------|-------------|-------------|-------------|------------|------|------------|-------------|-------------------------|-------------------------|----------------|--------------------------|-------------|--------|
|         |                 |                                             | MST n (x)   | MST n (x)   | MST n (x)   | Avg MST    | SEM  | MST n (x)  | vs sod-1(+) | vs sod-1WT <sup>M</sup> | vs sod-1WT <sup>C</sup> | vs hSOD1WT-YFP | vs sod-1(-); hSOD1WT-YFP | vs sod-1(-) |        |
| Fig S1A | -               | <i>sod-1WT<sup>M</sup></i>                  | 11 30 (13)  | 17 30 (8)   | 13 30 (7)   | 13.67      | 1.76 | 13 90 (28) |             |                         |                         |                |                          |             |        |
|         | -               | <i>sod-1A4V<sup>M</sup></i>                 | 11 30 (8)   | 13 30 (11)  | 7 30 (9)    | 10.33      | 1.76 | 11 90 (28) |             | <0.0001                 |                         |                |                          |             |        |
|         | -               | <i>sod-1H71Y<sup>M</sup></i>                | 7 30 (5)    | 13 30 (7)   | 9 30 (8)    | 9.67       | 1.76 | 9 90 (20)  |             | 0.0051                  |                         |                |                          |             |        |
|         | -               | <i>sod-1G85R<sup>M</sup></i>                | 13 30 (11)  | 13 30 (10)  | 11 30 (9)   | 12.33      | 0.67 | 13 90 (30) |             | 0.6378                  |                         |                |                          |             |        |
|         | -               | <i>empty<sup>M</sup></i>                    | 9 30 (6)    | 11 30 (11)  | 9 30 (11)   | 9.67       | 0.67 | 9 90 (28)  |             | 0.0309                  |                         |                |                          |             |        |
| Fig S1B | -               | <i>sod-1(+)</i>                             | 12 30 (19)  | 12 30 (4)   | 12 30 (7)   | 12.00      | 0.00 | 12 90 (30) |             |                         |                         |                |                          |             |        |
|         | -               | <i>sod-1WT<sup>C</sup></i>                  | 14 30 (13)  | 14 30 (11)  | 14 30 (8)   | 14.00      | 0.00 | 14 90 (32) | 0.8594      |                         |                         |                |                          |             |        |
|         | -               | <i>sod-1L84V<sup>C</sup></i>                | 10 30 (12)  | 10 30 (5)   | 12 30 (8)   | 10.67      | 0.67 | 12 90 (25) |             |                         | 0.02                    |                |                          |             |        |
|         | -               | <i>sod-1G85R<sup>C</sup></i>                | 18 30 (7)   | 16 30 (7)   | 14 30 (10)  | 16.00      | 1.15 | 16 90 (24) |             |                         | 0.3181                  |                |                          |             |        |
|         | -               | <i>sod-1G93A<sup>C</sup></i>                | 10 30 (13)  | 8 30 (2)    | 12 30 (7)   | 10.00      | 1.15 | 12 90 (22) |             |                         | 0.0296                  |                |                          |             |        |
| Fig S1C | -               | <i>sod-1(+)</i>                             | 10 30 (24)  | 14 30 (17)  | 14 30 (10)  | 12.67      | 1.33 | 12 90 (51) |             |                         |                         |                |                          |             |        |
|         | -               | <i>hSOD1WT-YFP<sup>OE</sup></i>             | 10 30 (14)  | 14 30 (11)  | 16 30 (10)  | 13.33      | 1.76 | 14 90 (35) | 0.3576      |                         |                         |                |                          |             |        |
|         | -               | <i>hSOD1G85R-YFP<sup>OE</sup></i>           | 10 30 (13)  | 12 30 (12)  | 7 30 (4)    | 9.67       | 1.45 | 10 90 (29) |             |                         |                         | 0.111          |                          |             |        |
| Fig S1D | -               | <i>sod-1(+)</i>                             | 12 30 (19)  | 12 30 (4)   | 12 30 (7)   | 12.00      | 0.00 | 12 90 (30) |             |                         |                         |                |                          |             |        |
|         | -               | <i>sod-1(-)</i>                             | 12 30 (6)   | 10 30 (3)   | 10 30 (4)   | 10.67      | 0.67 | 10 90 (13) | 0.0418      |                         |                         |                |                          |             |        |
|         | -               | <i>sod-1(-); hSOD1WT-YFP<sup>OE</sup></i>   | 12 30 (11)  | 10 30 (9)   | 14 30 (11)  | 12.00      | 1.15 | 12 90 (31) |             |                         |                         |                |                          |             | 0.442  |
|         | -               | <i>sod-1(-); hSOD1G85R-YFP<sup>OE</sup></i> | 16 30 (22)  | 14 30 (19)  | 16 30 (21)  | 15.33      | 0.67 | 16 90 (62) |             |                         |                         |                | 0.0038                   |             | 0.022  |
| Fig S2A | +               | <i>sod-1WT<sup>M</sup></i>                  | 8 30 (23)   | 7 30 (29)   | 7 30 (12)   | 7.33       | 0.33 | 7 90 (64)  |             |                         |                         |                |                          |             |        |
|         | +               | <i>sod-1A4V<sup>M</sup></i>                 | 10 30 (29)  | 9 30 (26)   | 9 30 (20)   | 9.33       | 0.33 | 9 90 (75)  |             | 0.0001                  |                         |                |                          |             |        |
|         | +               | <i>sod-1H71Y<sup>M</sup></i>                | 3 30 (20)   | Und 30 (27) | 3 30 (25)   | 3.00       | 0.00 | 3 90 (72)  |             | <0.0001                 |                         |                |                          |             |        |
|         | +               | <i>sod-1G85R<sup>M</sup></i>                | 3 30 (18)   | Und 30 (21) | 4 30 (27)   | 3.50       | 0.50 | 3 90 (66)  |             | <0.0001                 |                         |                |                          |             |        |
|         | +               | <i>empty<sup>M</sup></i>                    | 3 30 (25)   | 3 30 (22)   | 4 30 (26)   | 3.33       | 0.33 | 3 90 (73)  |             | <0.0001                 |                         |                |                          |             |        |
| Fig S2B | +               | <i>sod-1(+)</i>                             | Und 30 (28) | 9 30 (27)   | 9 30 (19)   | 9.00       | 0.00 | 9 90 (74)  |             |                         |                         |                |                          |             |        |
|         | +               | <i>sod-1(-)</i>                             | 3 30 (19)   | 4 30 (24)   | 3 30 (24)   | 3.33       | 0.33 | 3 90 (67)  | <0.0001     |                         |                         |                |                          |             |        |
|         | +               | <i>sod-1WT<sup>C</sup></i>                  | 9 30 (20)   | 7 30 (24)   | Und 30 (28) | 8.00       | 1.00 | 9 90 (72)  | 0.7472      |                         |                         |                |                          |             |        |
|         | +               | <i>sod-1L84V<sup>C</sup></i>                | 9 30 (17)   | 9 30 (21)   | 5 30 (16)   | 7.67       | 1.33 | 8 90 (54)  |             |                         | 0.0032                  |                |                          |             |        |
|         | +               | <i>sod-1G85R<sup>C</sup></i>                | 3 20 (7)    | 6 30 (18)   | 3 30 (20)   | 4.00       | 1.00 | 4 90 (45)  |             |                         | <0.0001                 |                |                          |             |        |
|         | +               | <i>sod-1G93A<sup>C</sup></i>                | 7 30 (15)   | 8 30 (22)   | 7 30 (22)   | 7.33       | 0.33 | 7 90 (59)  |             |                         | 0.0071                  |                |                          |             |        |
| Fig S2C | +               | <i>sod-1(+)</i>                             | 7 30 (20)   | 7 30 (27)   | 6 30 (21)   | 6.67       | 0.33 | 7 90 (68)  |             |                         |                         |                |                          |             |        |
|         | +               | <i>hSOD1WT-YFP<sup>OE</sup></i>             | Und 30 (28) | 6 30 (28)   | 6 30 (24)   | 6.00       | 0.00 | 6 90 (80)  | 0.0098      |                         |                         |                |                          |             |        |
|         | +               | <i>hSOD1G85R-YFP<sup>OE</sup></i>           | Und 30 (27) | 2 30 (26)   | 3 30 (24)   | 2.50       | 0.50 | 3 90 (77)  |             |                         |                         | <0.0001        |                          |             |        |
| Fig S2D | +               | <i>sod-1(+)</i>                             | 9 30 (19)   | 9 30 (16)   | 9 30 (22)   | 9.00       | 0.00 | 9 90 (57)  |             |                         |                         |                |                          |             |        |
|         | +               | <i>sod-1(-)</i>                             | 3 30 (24)   | 3 30 (21)   | Und 30 (30) | 3.00       | 0.00 | 3 90 (75)  | <0.0001     |                         |                         |                |                          |             |        |
|         | +               | <i>sod-1(-); hSOD1WT-YFP<sup>OE</sup></i>   | 4 30 (27)   | 3 30 (23)   | 5 30 (25)   | 4.00       | 0.58 | 4 90 (75)  |             |                         |                         |                |                          |             | 0.042  |
|         | +               | <i>sod-1(-); hSOD1G85R-YFP<sup>OE</sup></i> | 3 30 (13)   | 3 30 (7)    | 2 30 (9)    | 2.67       | 0.33 | 3 90 (29)  |             |                         |                         |                | 0.0002                   |             | 0.0713 |
