# Supplementary material for: Single copy/knock-in models of ALS SOD1 in C. elegans suggest loss and gain of function have different contributions to cholinergic and glutamatergic neurodegeneration
Source: PubMed Central journal article supplement (PMC6200258; doi:10.1371/journal.pgen.1007682), 2018-10-08
Supplement: pgen.1007682.s009.pdf [file pgen.1007682.s009.pdf]

| Panel  | Assay                                 | <i>sod-1(+)</i> | <i>sod-1(-)</i> | <i>sod-1WT<sup>M</sup></i> | <i>empty<sup>M</sup></i> | <i>sod-1A4V<sup>M</sup></i> | <i>sod-1H71V<sup>M</sup></i> | <i>sod-1G85R<sup>M</sup></i> | <i>sod-1WT<sup>C</sup></i> | <i>sod-1L84V<sup>C</sup></i> | <i>sod-1G85R<sup>C</sup></i> | <i>sod-1G93A<sup>C</sup></i> | <i>hSOD1WT-YFP<sup>OE</sup></i> | <i>hSOD1G85R-YFP<sup>OE</sup></i> | <i>sod-1(-); hSOD1WT-YFP<sup>OE</sup></i> | <i>sod-1(-); hSOD1G85R-YFP<sup>OE</sup></i> |
|--------|---------------------------------------|-----------------|-----------------|----------------------------|--------------------------|-----------------------------|------------------------------|------------------------------|----------------------------|------------------------------|------------------------------|------------------------------|---------------------------------|-----------------------------------|-------------------------------------------|---------------------------------------------|
| Fig 2  | neuronal hSOD1 inclusions             | control         | n.s.            | control                    | n.s.                     | increased                   | increased                    | increased                    | control                    | n.s.                         | increased                    | increased                    | same as in <i>sod-1(+)</i>      | increased (Wang et al., 2009)     | n.a.                                      | n.a.                                        |
| Fig 3  | aldicarb sensitivity                  | control         | increased       | n.a.                       | increased                | n.s.                        | increased                    | n.s.                         | control                    | n.s.                         | increased                    | n.s.                         | control                         | decreased; (Wang et al., 2009)    | control                                   | n.a.                                        |
| Fig 4  | PQ-induced cholinergic degeneration   | control         | n.s.            | control                    | n.s.                     | increased                   | increased                    | increased                    | control                    | n.s.                         | increased                    | increased                    | control                         | increased                         | control                                   | increased                                   |
| Fig 5  | PQ-induced glutamatergic degeneration | control         | increased       | control                    | increased                | n.s.                        | increased                    | increased                    | control                    | increased                    | increased                    | n.s.                         | control                         | increased                         | control                                   | increased                                   |
| Fig S1 | survival                              | control         | decreased       | control                    | decreased                | decreased                   | decreased                    | n.s.                         | control                    | decreased                    | n.s.                         | decreased                    | control                         | n.s.                              | control                                   | increased                                   |
| Fig S2 | PQ sensitivity                        | control         | decreased       | control                    | decreased                | increased                   | decreased                    | decreased                    | control                    | decreased                    | decreased                    | decreased                    | control                         | decreased                         | control                                   | decreased                                   |
